# Supplementary material for: Artificial Sweeteners and Sugar Ingredients as Reducing Agent for Green Synthesis of Silver Nanoparticles
Source: Hindawi journal article supplement (doi:10.1155/2019/9641860), 2019-01-21
Supplement: f1 [file 9641860.f1.pdf]

## Artificial Sweeteners and Sugar Ingredients as Reducing Agent for Green Synthesis of Silver Nanoparticles (Supplementary Information)

Shohreh Hemmati <sup>1, 2</sup>, Erin Retzlaff-Roberts <sup>1</sup>, Corren Scott <sup>1</sup>, and Michael T. Harris <sup>1</sup>

<sup>1</sup> Davidson School of Chemical Engineering, Purdue University, West Lafayette, IN 47907

<sup>2</sup> School of Chemical Engineering, Oklahoma State University, Stillwater, OK 74078

Correspondence should be addressed to Michael Harris<sup>\*</sup>; [mtharris@purdue.edu](mailto:mtharris@purdue.edu)

<sup>\*</sup>The datasets generated during the current study are available from the corresponding author on reasonable request.

### Supplementary Information

#### *UV-vis Characterization during the Course of Reactions*

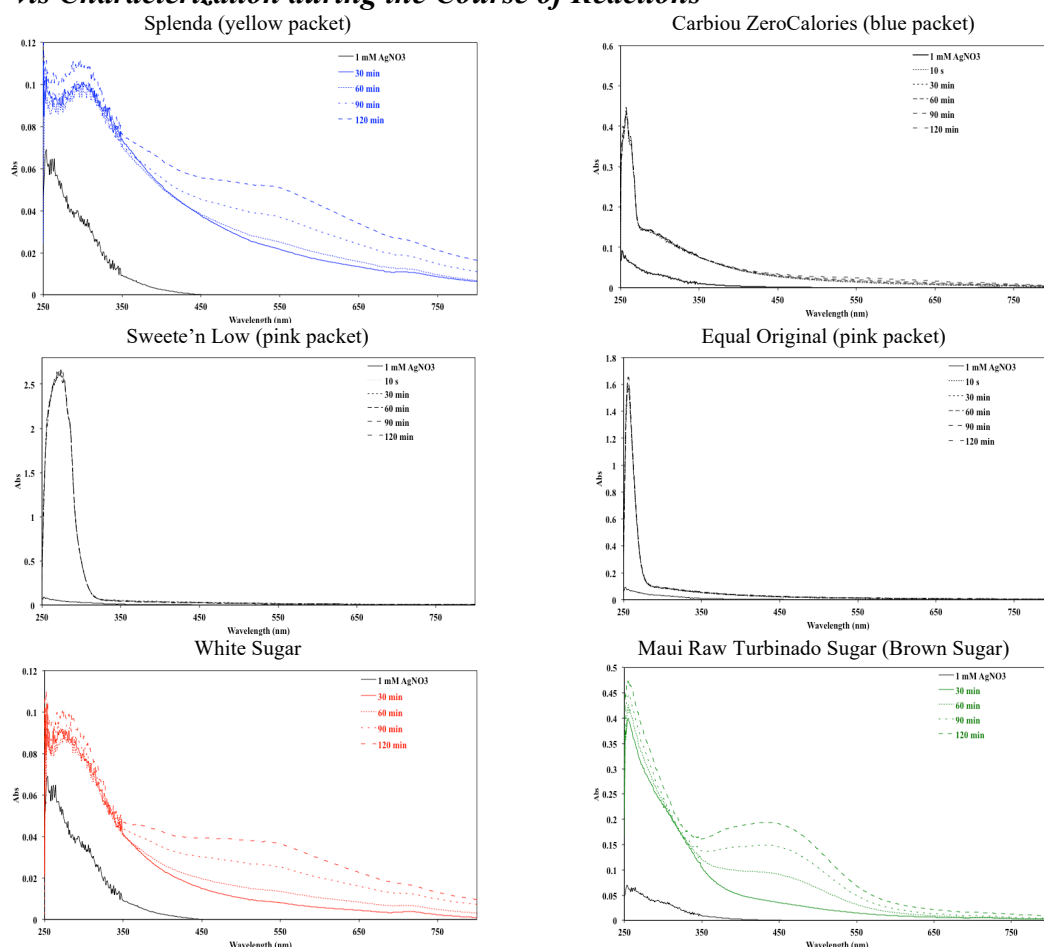

Figure S1: UV-vis characterization during the synthesis of AgNPs (1 mM AgNO<sub>3</sub>, 2 wt.% sugar substitutes or artificial sweeteners, T= 25 °C, 2 h reaction time).

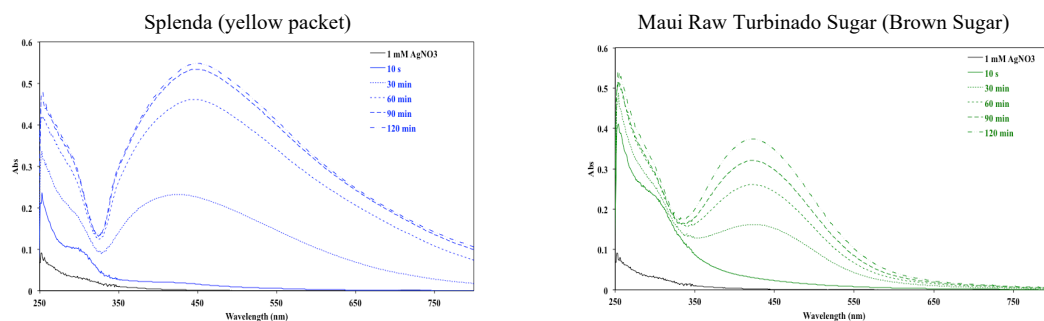

Figure S2: UV-vis characterization during the synthesis of AgNPs (1 mM  $\text{AgNO}_3$ , 1.6 mM PVP, 2 wt.% sugar substitutes or artificial sweeteners,  $T = 50^\circ\text{C}$ , 2 h reaction time).

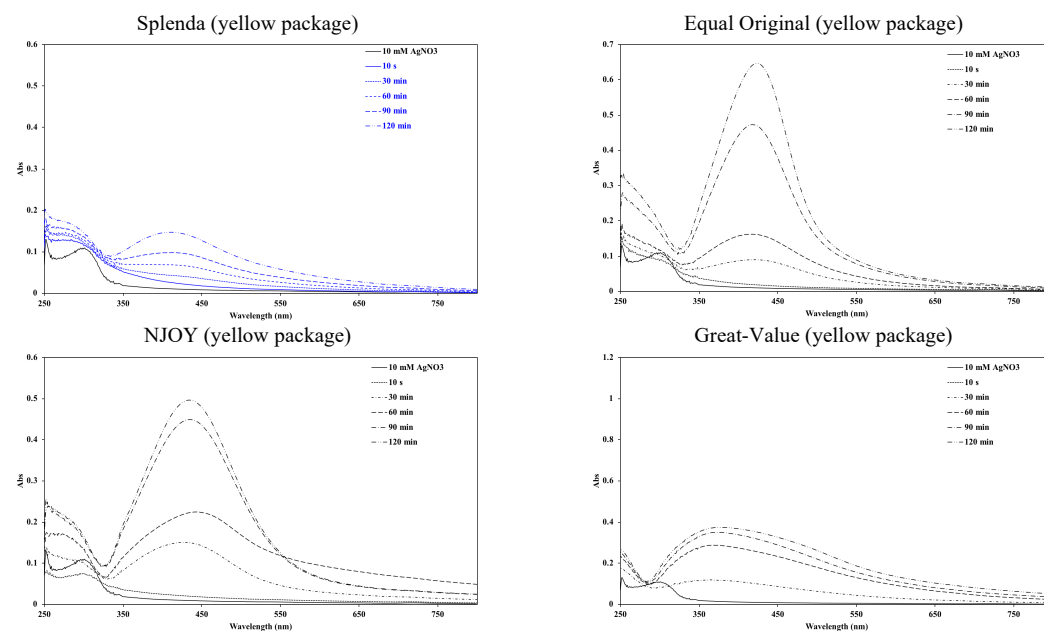

Figure S3: UV-vis characterization during the synthesis of AgNPs (10 mM  $\text{AgNO}_3$ , 16 mM PVP, 2 wt.% sugar substitutes or artificial sweeteners,  $T = 50^\circ\text{C}$ , 2 h reaction time).

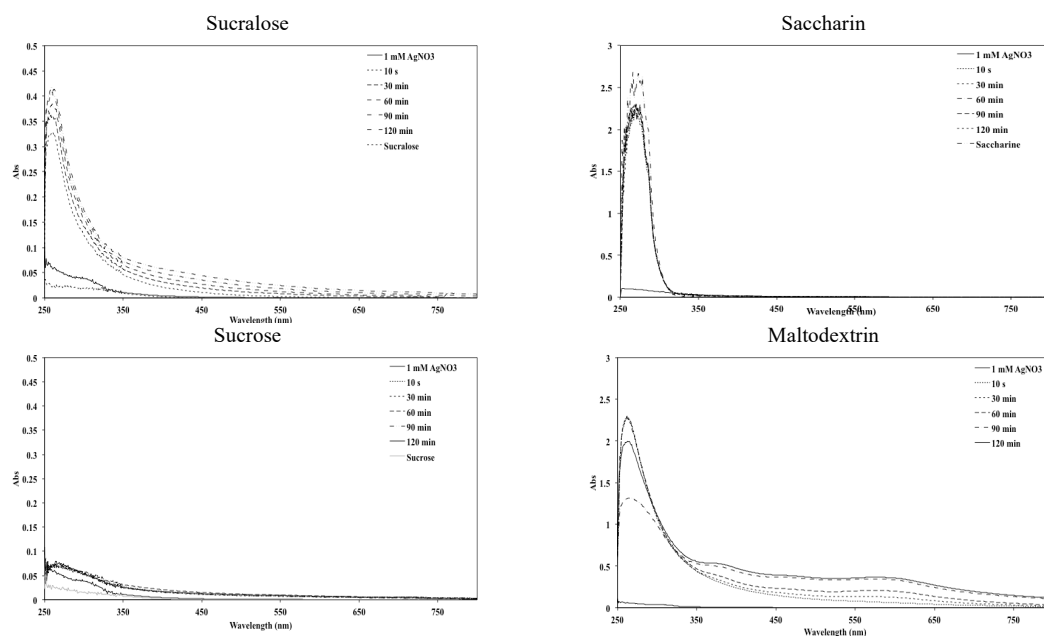

Figure S4: UV-vis characterization during the synthesis of AgNPs (1 mM  $\text{AgNO}_3$ ,  $T = 50^\circ\text{C}$ , 2 h reaction time).

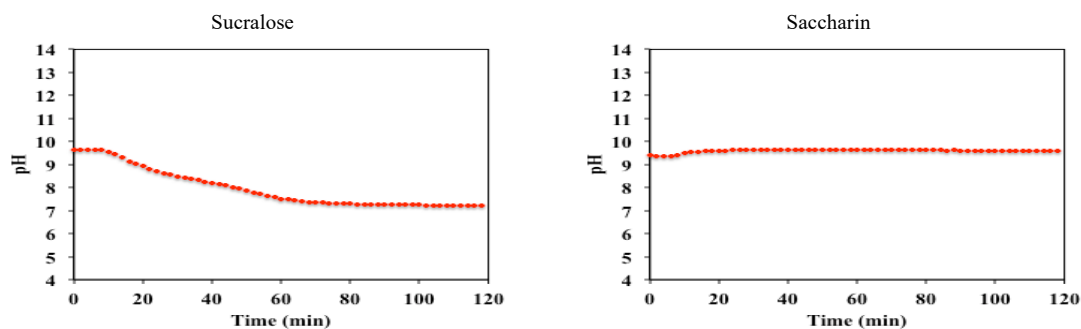

Figure S5: pH measurement during the synthesis of AgNPs in presence of NaOH (10 mM  $\text{AgNO}_3$ ,  $T = 50^\circ\text{C}$ , 2 h reaction time).

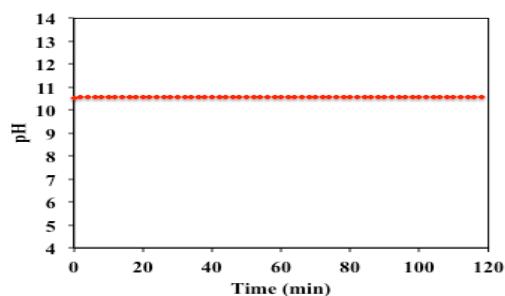

Figure S6: pH measurement during the synthesis of AgNPs utilizing NaOH as reducing agent (10 mM  $\text{AgNO}_3$ ,  $T = 50^\circ\text{C}$ , 2 h reaction time).

Table S1: UV-vis result summary.

| Reducing Agent and its concentration (2 wt.%) | AgNO <sub>3</sub> Concentration (mM) | PVP Concentration (mM) | Reaction Temperature (°C) | Reaction Time (hr) | UV-vis Peak Range (nm) | Figure Number |
|-----------------------------------------------|--------------------------------------|------------------------|---------------------------|--------------------|------------------------|---------------|
| Splenda (yellow packet)                       | 1                                    | –                      | 50                        | 2                  | 475-575                | Figure 1      |
| Carbiou Zero Calories (blue packet)           | 1                                    | –                      | 50                        | 2                  | –                      | Figure 1      |
| Sweete'n Low (pink packet)                    | 1                                    | –                      | 50                        | 2                  | 350-450                | Figure 1      |
| Equal Original (pink packet)                  | 1                                    | –                      | 50                        | 2                  | –                      | Figure 1      |
| White Sugar                                   | 1                                    | –                      | 50                        | 2                  | 450-600                | Figure 1      |
| Maui Raw Turbinado Sugar (Brown Sugar)        | 1                                    | –                      | 50                        | 2                  | 350-500                | Figure 1      |
| Splenda (yellow packet)                       | 1                                    | –                      | 25                        | 2                  | 450-650                | Figure S1     |
| Carbiou Zero Calories (blue packet)           | 1                                    | –                      | 25                        | 2                  | –                      | Figure S1     |
| Sweete'n Low (pink packet)                    | 1                                    | –                      | 25                        | 2                  | –                      | Figure S1     |
| Equal Original (pink packet)                  | 1                                    | –                      | 25                        | 2                  | –                      | Figure S1     |
| White Sugar                                   | 1                                    | –                      | 25                        | 2                  | 450-650                | Figure S1     |
| Maui Raw Turbinado Sugar (Brown Sugar)        | 1                                    | –                      | 25                        | 2                  | 350-550                | Figure S1     |
| Splenda (yellow packet)                       | 10                                   | –                      | 50                        | 2                  | 350-650                | Figure 2      |
| Maui Raw Turbinado Sugar (Brown Sugar)        | 10                                   | –                      | 50                        | 2                  | 350-550                | Figure 2      |
| Splenda (yellow packet)                       | 1                                    | 1.6                    | 50                        | 2                  | 350-650                | Figure S2     |
| Maui Raw Turbinado Sugar (Brown Sugar)        | 1                                    | 1.6                    | 50                        | 2                  | 350-550                | Figure S2     |
| Splenda (yellow packet)                       | 10                                   | –                      | 50                        | 2                  | 350-650                | Figure 3      |
| Equal Original (yellow packet)                | 10                                   | –                      | 50                        | 2                  | 350-550                | Figure 3      |
| NJOY (yellow packet)                          | 10                                   | –                      | 50                        | 2                  | 350-400                | Figure 3      |
| Great-Value (yellow packet)                   | 10                                   | –                      | 50                        | 2                  | 350-700                | Figure 3      |
| Splenda (yellow packet)                       | 10                                   | 16                     | 50                        | 2                  | 350-500                | Figure S3     |
| Equal Original (yellow packet)                | 10                                   | 16                     | 50                        | 2                  | 350-500                | Figure S3     |
| NJOY (yellow packet)                          | 10                                   | 16                     | 50                        | 2                  | 350-550                | Figure S3     |
| Great-Value (yellow packet)                   | 10                                   | 16                     | 50                        | 2                  | 350-650                | Figure S3     |
| Sucralose                                     | 10                                   | –                      | 50                        | 2                  | –                      | Figure 4      |
| Saccharin                                     | 10                                   | –                      | 50                        | 2                  | –                      | Figure 4      |
| Sucrose                                       | 10                                   | –                      | 50                        | 2                  | –                      | Figure 4      |
| Maltodextrin                                  | 10                                   | –                      | 50                        | 2                  | 450-650                | Figure 4      |
| Sucralose                                     | 1                                    | –                      | 50                        | 2                  | –                      | Figure S4     |
| Saccharin                                     | 1                                    | –                      | 50                        | 2                  | –                      | Figure S4     |
| Sucrose                                       | 1                                    | –                      | 50                        | 2                  | –                      | Figure S4     |
| Maltodextrin                                  | 1                                    | –                      | 50                        | 2                  | 500-650                | Figure S4     |
| Sucralose 10 $\mu$ L NaOH                     | 10                                   | –                      | 50                        | 2                  | –                      | Figure 5      |
| Saccharin 40 $\mu$ L NaOH                     | 10                                   | –                      | 50                        | 2                  | 350-500                | Figure 5      |
| NaOH                                          | 10                                   | –                      | 50                        | 2                  | 300-600                | Figure 6      |

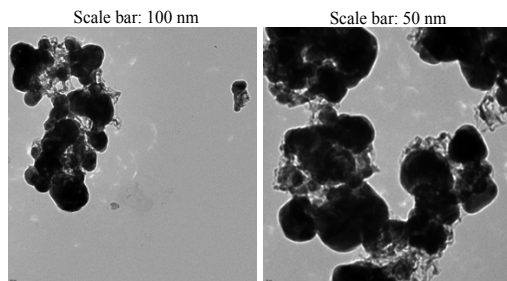

Figure S7: TEM images of the synthesized AgNPs utilizing Maui Turbinado brown sugar as reducing agent (1 mM  $\text{AgNO}_3$ ,  $T = 50^\circ\text{C}$ , 2 h reaction time).

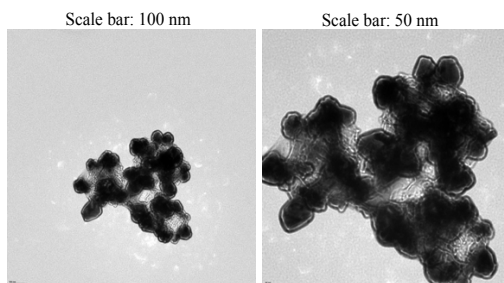

Figure S8: TEM images of the synthesized AgNPs utilizing Splenda (yellow packet) as reducing agent (1 mM  $\text{AgNO}_3$ ,  $T = 50^\circ\text{C}$ , 2 hrs reaction time).

(A) Sucralose in presence of NaOH (10 mM  $\text{AgNO}_3$ , 10  $\mu\text{l}$  NaOH,  $T = 50^\circ\text{C}$ , 2 h reaction time)

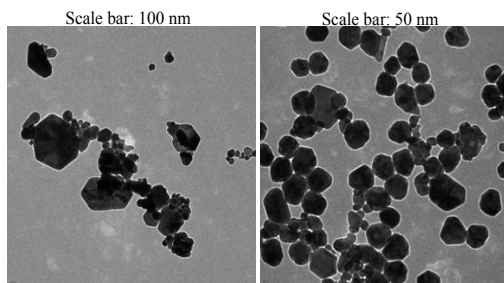

(B) Saccharin in presence of NaOH (10 mM  $\text{AgNO}_3$ , 40  $\mu\text{l}$  NaOH,  $T = 50^\circ\text{C}$ , 2 h reaction time)

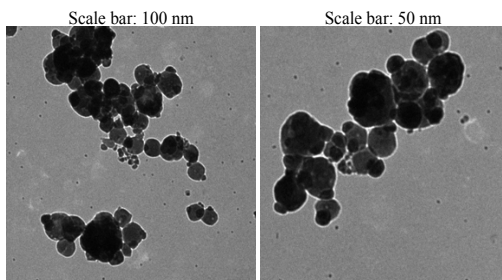

Figure S9: TEM images of the synthesized AgNPs utilizing sucralose (A) and saccharin (B).
